# Supplementary material for: Operationalizing the 2018 World Cancer Research Fund/American Institute for Cancer Research (WCRF/AICR) Cancer Prevention Recommendations: A Standardized Scoring System
Source: PubMed Central journal article supplement (PMC6682977; doi:10.3390/nu11071572), 2019-07-12
Supplement: nutrients-11-01572-s001.pdf [file nutrients-11-01572-s001.pdf]

| Food items                                                                                                                          | aUPFs | All UPFs |
|-------------------------------------------------------------------------------------------------------------------------------------|-------|----------|
| Sour cream (regular, low-fat, fat-free)                                                                                             | x     | x        |
| Cream cheese (regular, low-fat, fat-free)                                                                                           | x     | x        |
| Ice cream, regular                                                                                                                  | x     | x        |
| Frozen yogurt, ice milk                                                                                                             | x     | x        |
| Beef burgers (lean, regular)                                                                                                        |       | x        |
| Hot dogs (regular, low-fat, turkey)                                                                                                 |       | x        |
| Fried chicken (light/dark meat, with/without skin)                                                                                  | x     | x        |
| Fried fish                                                                                                                          | x     | x        |
| Creamed soups                                                                                                                       | x     | x        |
| English muffins, bagels, white breads and rolls, crackers (high-fat, low-fat), tortillas                                            | x     | x        |
| Cornbread/muffins, biscuits, quick breads, donuts, sweet rolls, pancakes, waffles, french toast                                     | x     | x        |
| Ready-to-eat cereal (highly fortified, other)                                                                                       | x     | x        |
| Cookies, brownies, cakes (regular, low-fat)                                                                                         | x     | x        |
| Pies (fruit, cream/custard, pumpkin, sweet potato, other)                                                                           | x     | x        |
| Chips (potato, corn, other, regular, low-fat), popcorn                                                                              | x     | x        |
| Rice, grains (NFA)                                                                                                                  | x     | x        |
| Pasta (NFA), lasagna, ravioli, shells, etc.                                                                                         | x     | x        |
| Macaroni and cheese, pizza, fried potatoes                                                                                          | x     | x        |
| Gravy                                                                                                                               | x     | x        |
| Potato salads                                                                                                                       | x     | x        |
| Margarine (stick, tub, diet), margarine/butter blend, and butter- on bread, pancakes, waffles, potatoes, vegetables, and other uses | x     | x        |
| Salad dressing (regular, low-fat, nearly non-fat)                                                                                   | x     | x        |
| Mayonnaise (regular, diet, fat-free)- on sandwiches and salad                                                                       | x     | x        |
| Vegetable shortening, lard, fatback bacon fat                                                                                       | x     | x        |
| Candy (chocolate and non-chocolate)                                                                                                 | x     | x        |
| Presweetened tea (regular, decaf), soft drinks (regular, decaf), fruit drinks (regular)                                             |       | x        |
| Diet, presweetened tea and soft drinks (caffeinated, decaffeinated), diet fruit drinks                                              | x     | x        |
| Saccharine, aspartame (in coffee or tea)                                                                                            | x     | x        |

**Figure S1.** Ultra-processed foods (UPFs) included to create the adapted ultra-processed food variable (aUPF) in the NIH-AARP Diet and Health Study dataset

**Table S1.** Distribution of percent total energy from UPFs vs. aUPFs in the NIH-AARP Diet and Health Study (N=545,825)

| Tertiles                          | N       | Median (%) | Minimum (%) | Maximum (%) |
|-----------------------------------|---------|------------|-------------|-------------|
| Including all UPFs <sup>1</sup>   |         |            |             |             |
| T1                                | 181,941 | 29.935     | 0           | 36.738      |
| T2                                | 181,942 | 42.342     | 36.739      | 48.003      |
| T3                                | 181,942 | 55.18      | 48.003      | 99.097      |
| Including aUPFs only <sup>2</sup> |         |            |             |             |
| T1                                | 181,941 | 26.942     | 0           | 33.031      |
| T2                                | 181,942 | 37.958     | 33.032      | 42.930      |
| T3                                | 181,942 | 49.246     | 42.930      | 99.097      |

aUPFs, adapted ultra-processed foods; UPFs, ultra-processed foods from the NOVA classification system [28]

<sup>1</sup> Ultra-processed foods (UPFs) were defined with guidance from the NOVA classification system

<sup>2</sup> Sugar-sweetened drinks and red and processed meats were removed from the UPF variable to create the adapted UPF variable (aUPF)
